# Supplementary material for: Cloud response to co-condensation of water and organic vapors over the boreal forest
Source: Copernicus journal article supplement (doi:10.5194/acp-24-5117-2024), 2024-04-30
Supplement: Supplementary file 1 [file acp-24-5117-2024-supplement.pdf]

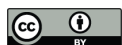

*Supplement of*

## **Cloud response to co-condensation of water and organic vapors over the boreal forest**

**Liine Heikkinen et al.**

*Correspondence to:* Liine Heikkinen (liine.heikkinen@aces.su.se) and Ilona Riipinen (ilona.riipinen@aces.su.se)

The copyright of individual parts of the supplement might differ from the article licence.

## Supplementary tables

**Table S.1** Observation-based input data used in the PARSEC-UFO simulations.

| ID | Time [EET]           | $N_1$ [cm <sup>-3</sup> ] | $D_1$ [nm] | $\sigma_1$ | $N_2$ [cm <sup>-3</sup> ] | $D_2$ [nm] | $\sigma_2$ | $f_{\text{Org}}$ | $T$ [K] |
|----|----------------------|---------------------------|------------|------------|---------------------------|------------|------------|------------------|---------|
| 1  | 11-Apr-2014 18:19:42 | 165                       | 17         | 1.92       | 801                       | 78         | 1.90       | 0.66             | 275     |
| 2  | 12-Apr-2014 15:13:20 | 2786                      | 38         | 1.75       | 72                        | 154        | 1.75       | 0.63             | 281     |
| 3  | 12-Apr-2014 16:50:19 | 2591                      | 41         | 1.75       | 143                       | 150        | 1.75       | 0.78             | 282     |
| 4  | 12-Apr-2014 18:27:45 | 2233                      | 46         | 1.75       | 158                       | 141        | 1.75       | 0.72             | 281     |
| 5  | 13-Apr-2014 13:52:58 | 427                       | 42         | 1.79       | 403                       | 112        | 1.79       | 0.54             | 277     |
| 6  | 13-Apr-2014 17:06:58 | 574                       | 37         | 1.75       | 531                       | 125        | 1.75       | 0.50             | 277     |
| 7  | 13-Apr-2014 18:43:23 | 681                       | 39         | 1.77       | 502                       | 132        | 1.68       | 0.49             | 277     |
| 8  | 14-Apr-2014 14:07:53 | 2071                      | 33         | 1.73       | 44                        | 175        | 1.72       | 0.68             | 279     |
| 9  | 14-Apr-2014 15:44:53 | 2019                      | 36         | 1.71       | 44                        | 168        | 1.70       | 0.58             | 277     |
| 10 | 14-Apr-2014 18:58:22 | 1445                      | 25         | 1.82       | 533                       | 81         | 1.83       | 0.73             | 276     |
| 11 | 15-Apr-2014 14:22:27 | 320                       | 18         | 1.81       | 100                       | 108        | 1.67       | 0.41             | 277     |
| 12 | 15-Apr-2014 15:59:27 | 2490                      | 11         | 1.64       | 130                       | 121        | 1.72       | 0.36             | 275     |
| 13 | 15-Apr-2014 17:36:27 | 7831                      | 11         | 1.56       | 178                       | 92         | 1.82       | 0.26             | 274     |
| 14 | 16-Apr-2014 13:01:04 | 4019                      | 12         | 1.68       | 199                       | 114        | 1.83       | 0.53             | 279     |
| 15 | 16-Apr-2014 16:15:04 | 7147                      | 17         | 1.71       | 95                        | 141        | 1.75       | 0.60             | 274     |
| 16 | 16-Apr-2014 17:52:27 | 6445                      | 18         | 1.74       | 115                       | 130        | 1.77       | 0.56             | 273     |
| 17 | 17-Apr-2014 13:10:21 | 573                       | 14         | 1.93       | 2432                      | 75         | 1.77       | 0.49             | 285     |
| 18 | 17-Apr-2014 14:53:01 | 1098                      | 9          | 1.67       | 1665                      | 75         | 1.77       | 0.47             | 280     |
| 19 | 23-Apr-2014 15:42:18 | 10036                     | 16         | 1.58       | 69                        | 159        | 1.68       | 0.35             | 273     |
| 20 | 23-Apr-2014 17:24:05 | 8471                      | 18         | 1.5        | 81                        | 153        | 1.67       | 0.60             | 272     |
| 21 | 24-Apr-2014 15:42:05 | 8264                      | 15         | 1.77       | 1445                      | 74         | 1.87       | 0.74             | 275     |
| 22 | 24-Apr-2014 17:24:22 | 2461                      | 24         | 1.61       | 1868                      | 67         | 1.92       | 0.71             | 273     |
| 23 | 25-Apr-2014 13:47:46 | 160                       | 7          | 1.87       | 1788                      | 85         | 1.75       | 0.75             | 277     |
| 24 | 25-Apr-2014 17:09:13 | 469                       | 13         | 1.64       | 1760                      | 89         | 1.75       | 0.75             | 276     |
| 25 | 26-Apr-2014 13:32:08 | 606                       | 12         | 1.76       | 1717                      | 111        | 1.71       | 0.83             | 284     |
| 26 | 26-Apr-2014 16:55:49 | 776                       | 13         | 1.75       | 1647                      | 115        | 1.70       | 0.81             | 281     |
| 27 | 26-Apr-2014 18:38:37 | 862                       | 13         | 1.75       | 1611                      | 117        | 1.70       | 0.81             | 281     |
| 28 | 27-Apr-2014 13:20:13 | 1799                      | 15         | 1.74       | 1225                      | 138        | 1.66       | 0.74             | 286     |
| 29 | 27-Apr-2014 15:02:01 | 1884                      | 16         | 1.73       | 1190                      | 139        | 1.66       | 0.73             | 280     |
| 30 | 27-Apr-2014 16:44:19 | 1970                      | 16         | 1.73       | 1155                      | 141        | 1.66       | 0.73             | 278     |
| 31 | 28-Apr-2014 18:31:15 | 3262                      | 19         | 1.71       | 622                       | 170        | 1.61       | 0.63             | 278     |
| 32 | 29-Apr-2014 18:53:44 | 4484                      | 23         | 1.69       | 118                       | 197        | 1.56       | 0.54             | 273     |
| 33 | 30-Apr-2014 15:40:55 | 586                       | 22         | 2.03       | 260                       | 134        | 1.64       | 0.31             | 271     |
| 34 | 30-Apr-2014 17:22:36 | 486                       | 27         | 1.95       | 259                       | 132        | 1.78       | 0.25             | 272     |
| 35 | 01-May-2014 13:47:51 | 746                       | 20         | 1.74       | 321                       | 110        | 1.75       | 0.33             | 272     |
| 36 | 01-May-2014 15:29:30 | 669                       | 24         | 1.75       | 328                       | 112        | 1.74       | 0.35             | 271     |
| 37 | 01-May-2014 18:54:09 | 527                       | 30         | 1.75       | 325                       | 119        | 1.69       | 0.34             | 271     |
| 38 | 02-May-2014 15:17:34 | 3970                      | 14         | 2.01       | 254                       | 85         | 1.91       | 0.45             | 273     |
| 39 | 02-May-2014 16:59:49 | 3460                      | 16         | 1.85       | 305                       | 82         | 1.83       | 0.59             | 272     |
| 40 | 03-May-2014 13:56:25 | 2481                      | 10         | 1.73       | 423                       | 77         | 1.94       | 0.57             | 272     |
| 41 | 03-May-2014 15:38:24 | 4645                      | 13         | 1.67       | 149                       | 114        | 1.79       | 0.50             | 272     |
| 42 | 03-May-2014 17:16:28 | 5291                      | 17         | 1.63       | 150                       | 127        | 1.71       | 0.57             | 272     |
| 43 | 04-May-2014 13:05:10 | 3135                      | 31         | 1.63       | 199                       | 173        | 1.51       | 0.66             | 273     |
| 44 | 04-May-2014 16:34:44 | 3015                      | 30         | 1.66       | 214                       | 170        | 1.52       | 0.65             | 277     |
| 45 | 04-May-2014 18:11:22 | 2960                      | 30         | 1.67       | 221                       | 169        | 1.53       | 0.65             | 278     |
| 46 | 07-May-2014 16:09:31 | 4293                      | 14         | 1.69       | 742                       | 108        | 1.75       | 0.49             | 277     |
| 47 | 07-May-2014 17:50:43 | 1892                      | 16         | 1.69       | 619                       | 113        | 1.73       | 0.47             | 278     |
| 48 | 08-May-2014 14:35:16 | 820                       | 32         | 1.81       | 680                       | 117        | 1.85       | 0.48             | 280     |
| 49 | 08-May-2014 16:17:02 | 1025                      | 35         | 1.76       | 608                       | 122        | 1.79       | 0.50             | 282     |
| 50 | 09-May-2014 16:04:53 | 478                       | 45         | 1.79       | 827                       | 148        | 1.78       | 0.72             | 281     |
| 51 | 09-May-2014 17:47:14 | 549                       | 50         | 1.77       | 677                       | 166        | 1.81       | 0.72             | 283     |
| 52 | 10-May-2014 13:44:17 | 378                       | 25         | 1.74       | 745                       | 101        | 1.80       | 0.67             | 280     |

|    |                      |       |    |      |      |     |      |      |     |
|----|----------------------|-------|----|------|------|-----|------|------|-----|
| 53 | 10-May-2014 15:26:11 | 395   | 15 | 1.67 | 854  | 93  | 1.78 | 0.73 | 281 |
| 54 | 10-May-2014 17:14:48 | 599   | 13 | 1.60 | 969  | 90  | 1.73 | 0.74 | 282 |
| 55 | 11-May-2014 13:37:10 | 235   | 50 | 1.75 | 719  | 95  | 1.75 | 0.71 | 279 |
| 56 | 11-May-2014 17:01:29 | 542   | 53 | 1.75 | 560  | 104 | 1.75 | 0.67 | 277 |
| 57 | 11-May-2014 18:43:21 | 865   | 59 | 1.75 | 416  | 117 | 1.75 | 0.68 | 276 |
| 58 | 12-May-2014 15:44:33 | 214   | 19 | 1.84 | 619  | 91  | 1.80 | 0.70 | 276 |
| 59 | 13-May-2014 15:37:06 | 462   | 20 | 1.95 | 402  | 110 | 1.73 | 0.79 | 279 |
| 60 | 13-May-2014 17:18:29 | 248   | 24 | 2.07 | 365  | 115 | 1.73 | 0.83 | 277 |
| 61 | 14-May-2014 13:43:03 | 12316 | 14 | 1.67 | 221  | 143 | 1.68 | 0.52 | 282 |
| 62 | 14-May-2014 15:25:03 | 11628 | 16 | 1.61 | 110  | 181 | 1.58 | 0.57 | 283 |
| 63 | 14-May-2014 18:49:05 | 9930  | 18 | 1.51 | 95   | 167 | 1.59 | 0.28 | 286 |
| 64 | 15-May-2014 15:26:25 | 2487  | 32 | 1.88 | 104  | 117 | 1.85 | 0.57 | 287 |
| 65 | 15-May-2014 17:06:08 | 2664  | 27 | 2.01 | 394  | 83  | 1.91 | 0.53 | 291 |
| 66 | 15-May-2014 18:47:51 | 1933  | 26 | 1.82 | 622  | 94  | 1.79 | 0.47 | 293 |
| 67 | 16-May-2014 13:49:12 | 1588  | 43 | 2.04 | 1158 | 63  | 1.36 | 0.68 | 289 |
| 68 | 16-May-2014 15:30:49 | 1346  | 37 | 1.94 | 1397 | 69  | 1.47 | 0.68 | 292 |
| 69 | 16-May-2014 18:55:09 | 858   | 25 | 1.76 | 1879 | 83  | 1.68 | 0.69 | 295 |
| 70 | 17-May-2014 15:19:39 | 2445  | 14 | 1.78 | 1720 | 72  | 1.79 | 0.75 | 291 |
| 71 | 17-May-2014 17:00:54 | 4490  | 23 | 1.78 | 994  | 93  | 1.76 | 0.77 | 292 |
| 72 | 17-May-2014 18:43:24 | 6780  | 29 | 1.75 | 215  | 143 | 1.69 | 0.72 | 292 |
| 73 | 18-May-2014 13:25:36 | 6098  | 16 | 1.75 | 1277 | 100 | 1.74 | 0.74 | 289 |
| 74 | 18-May-2014 15:08:34 | 5917  | 21 | 1.75 | 1361 | 100 | 1.75 | 0.81 | 288 |
| 75 | 18-May-2014 18:32:48 | 1491  | 31 | 1.74 | 1923 | 90  | 1.76 | 0.84 | 288 |
| 76 | 20-May-2014 13:19:50 | 568   | 26 | 2.05 | 2217 | 89  | 1.95 | 0.70 | 291 |
| 77 | 20-May-2014 16:59:04 | 1489  | 61 | 1.79 | 1126 | 122 | 1.93 | 0.73 | 295 |
| 78 | 20-May-2014 18:30:32 | 1780  | 71 | 1.79 | 937  | 108 | 2.06 | 0.70 | 291 |
| 79 | 21-May-2014 13:17:01 | 724   | 56 | 1.76 | 979  | 141 | 1.67 | 0.65 | 288 |
| 80 | 22-May-2014 16:06:24 | 592   | 31 | 1.82 | 1480 | 131 | 1.71 | 0.82 | 287 |
| 81 | 22-May-2014 17:49:18 | 790   | 22 | 1.75 | 1454 | 112 | 1.75 | 0.78 | 282 |
| 82 | 24-May-2014 15:41:37 | 274   | 20 | 2.08 | 1820 | 139 | 1.61 | 0.76 | 276 |
| 83 | 24-May-2014 17:44:58 | 162   | 16 | 2.08 | 1823 | 138 | 1.63 | 0.71 | 277 |
| 84 | 25-May-2014 13:54:19 | 849   | 36 | 2.08 | 2309 | 112 | 1.82 | 0.74 | 276 |
| 85 | 25-May-2014 17:18:08 | 1246  | 33 | 1.76 | 1743 | 112 | 1.73 | 0.70 | 278 |
| 86 | 26-May-2014 13:42:24 | 1755  | 29 | 1.93 | 664  | 101 | 1.71 | 0.82 | 279 |
| 87 | 26-May-2014 15:24:24 | 1578  | 24 | 2.06 | 845  | 73  | 1.76 | 0.79 | 279 |
| 88 | 26-May-2014 17:06:25 | 1307  | 26 | 1.99 | 688  | 86  | 1.75 | 0.72 | 281 |
| 89 | 27-May-2014 13:30:45 | 1828  | 16 | 1.68 | 156  | 141 | 1.72 | 0.49 | 287 |
| 90 | 27-May-2014 16:54:32 | 691   | 22 | 1.90 | 177  | 148 | 1.74 | 0.58 | 286 |
| 91 | 27-May-2014 18:36:31 | 651   | 27 | 1.82 | 181  | 164 | 1.70 | 0.52 | 285 |
| 92 | 28-May-2014 13:18:47 | 2129  | 47 | 1.75 | 45   | 202 | 1.75 | 0.72 | 283 |
| 93 | 28-May-2014 15:00:47 | 1909  | 46 | 1.92 | 330  | 128 | 1.46 | 0.74 | 283 |
| 94 | 28-May-2014 16:42:47 | 1544  | 39 | 2.01 | 755  | 65  | 1.33 | 0.72 | 282 |
| 95 | 29-May-2014 13:07:10 | 1113  | 59 | 1.75 | 116  | 162 | 1.75 | 0.83 | 283 |
| 96 | 29-May-2014 16:30:59 | 1014  | 66 | 1.75 | 105  | 162 | 1.75 | 0.83 | 282 |
| 97 | 29-May-2014 18:12:59 | 883   | 67 | 1.66 | 311  | 147 | 1.78 | 0.83 | 284 |

**Table S.2** Overview of ammonium sulfate mass fractions ( $f_{AS}$ ) used in PARSEC-UFO simulations (first row), and the mass fractions obtained using an ion pairing method (Äijälä et al., 2017 supplementary material). The mass fractions of sulfuric acid ( $f_{SA}$ ), ammonium bisulfate ( $f_{ABS}$ ) and ammonium nitrate ( $f_{AN}$ ) are also provided. The ion pairing calculations are not performed when the ammonium concentrations from the ACSM were negative. These cases are also excluded from the PARSEC-UFO input data for the comparison displayed in this table. It is important to note that these numbers should not be taken as representative values of  $f_{SA}$ ,  $f_{ABS}$  or  $f_{AS}$  for the BAÉCC campaign, because negative ammonium concentrations, which represent noise below the ammonium detection limit, are omitted. In addition, for more reliable estimates of the ion pairing, more sophisticated thermodynamic modeling is required.

| Method                   | Parameter                   | Min  | Max  | Median |
|--------------------------|-----------------------------|------|------|--------|
| $f_{AS} = 1 - f_{Org}^a$ | $f_{AS}$                    | 0.16 | 0.75 | 0.32   |
| Ion pairing              | $f_{AS}$                    | 0    | 0.73 | 0.15   |
|                          | $f_{ABS}$                   | 0    | 0.52 | 0.12   |
|                          | $f_{SA}$                    | 0    | 0.26 | 0      |
|                          | $f_{AS} + f_{ABS} + f_{SA}$ | 0.12 | 0.75 | 0.29   |
|                          | $f_{AN}$                    | 0    | 0.17 | 0      |

<sup>a</sup> Used in PARSEC-UFO simulation input preparation.

## Supplementary figures

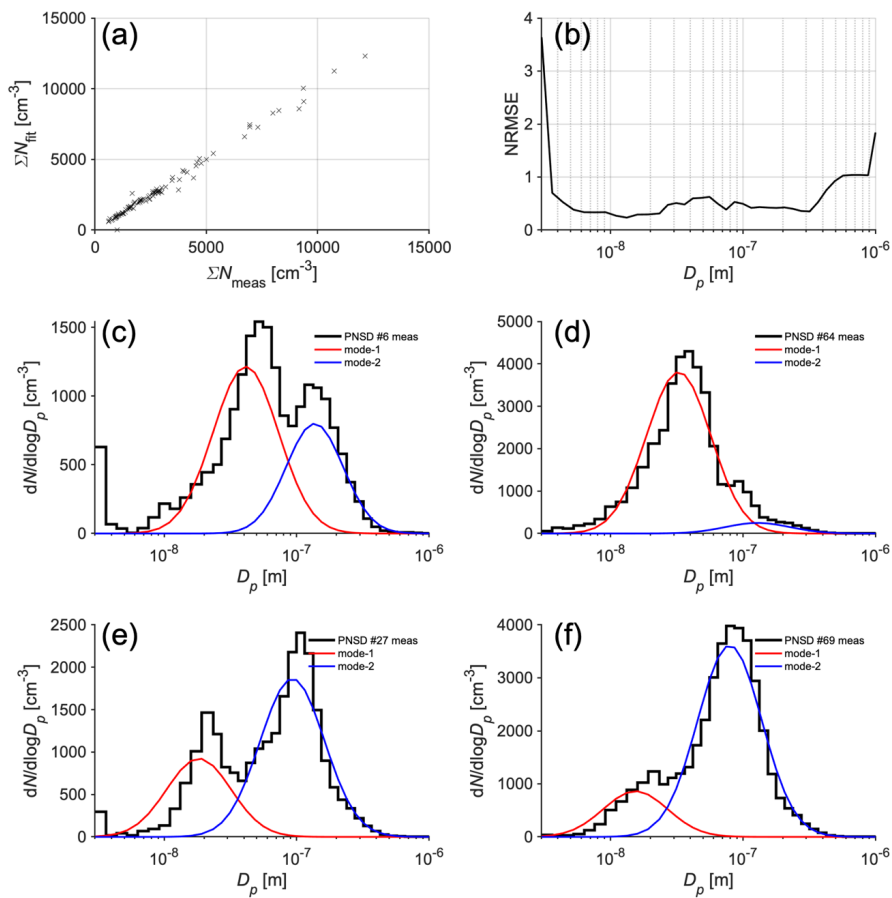

**Figure S.1** (a) A scatter plot between the number concentration of aerosol particles retrieved from the bimodal fits (y-axis) and the original DMPS measurements (x-axis). (b) The normalized root mean squared error (NRMSE) as function of particle dry diameter for the bimodal fits. (c–f) Bimodal fit examples are drawn over the observed black PNSD.

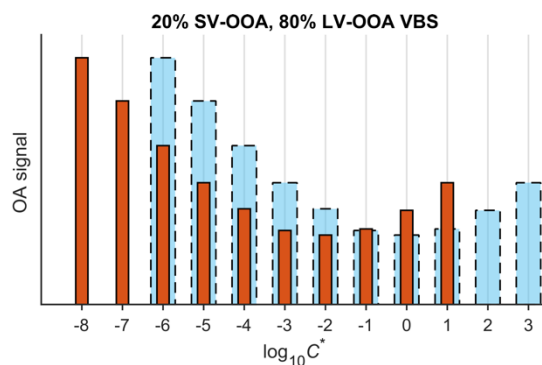

**Figure S.2** A volatility basis set representing 20% SV-OOA and 80% LV-OOA. The blue dashed bars represent the volatility distribution under 298K and the red bars represent the BAEEC PARSEC-UFO initialization temperature mean: 280K. The  $\log_{10} C^*$  axis is shifted according using Eq. (13) found in the main text of the paper. A constant enthalpy of vaporization is used for this example, but in the construction of CJ and F volatility distributions, enthalpy of vaporization depends on  $\log_{10} C^*$  (298K; Eq. 17).

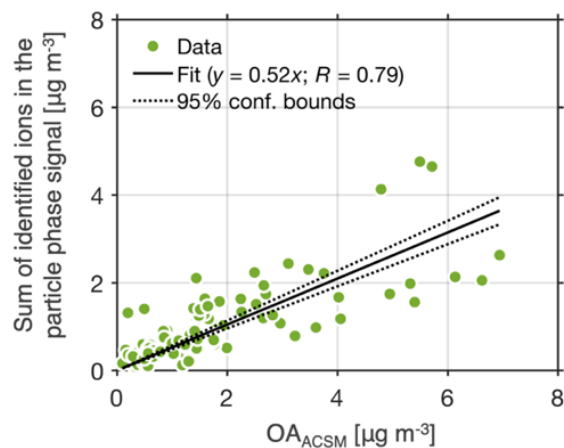

**Figure S.3** A comparison between the FIGAERO-I-CIMS particle phase (sum of signals of identified ions in the particle phase) and the OA concentration measured with the ACSM. The data shown here are daytime values only (hour of day  $>9$  and  $<19$ ) during the BAECC campaign.

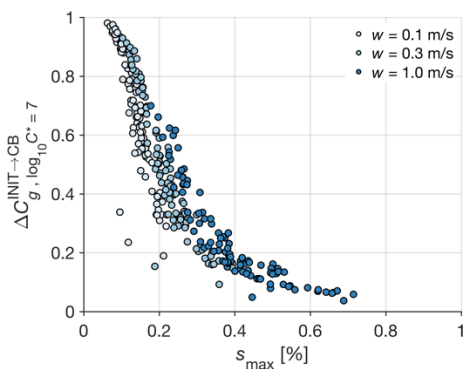

**Figure S.4** The fraction of organic vapor (in the  $\log_{10} C^* = 7$  volatility bin) condensed before the air parcel has reached cloud base vs the maximum supersaturation gained during the ascent. The darkest markers indicate simulations performed with an updraft velocity of  $1.0 \text{ m s}^{-1}$ , the light blue markers correspond the updraft velocity of  $0.3 \text{ m s}^{-1}$  and the white markers the updraft velocity of  $0.1 \text{ m s}^{-1}$ . If a high maximum supersaturation is reached, the condensation sink is low, and less IVOCs condense. If the maximum supersaturation is high, the condensation sink is high, and more IVOCs condense.

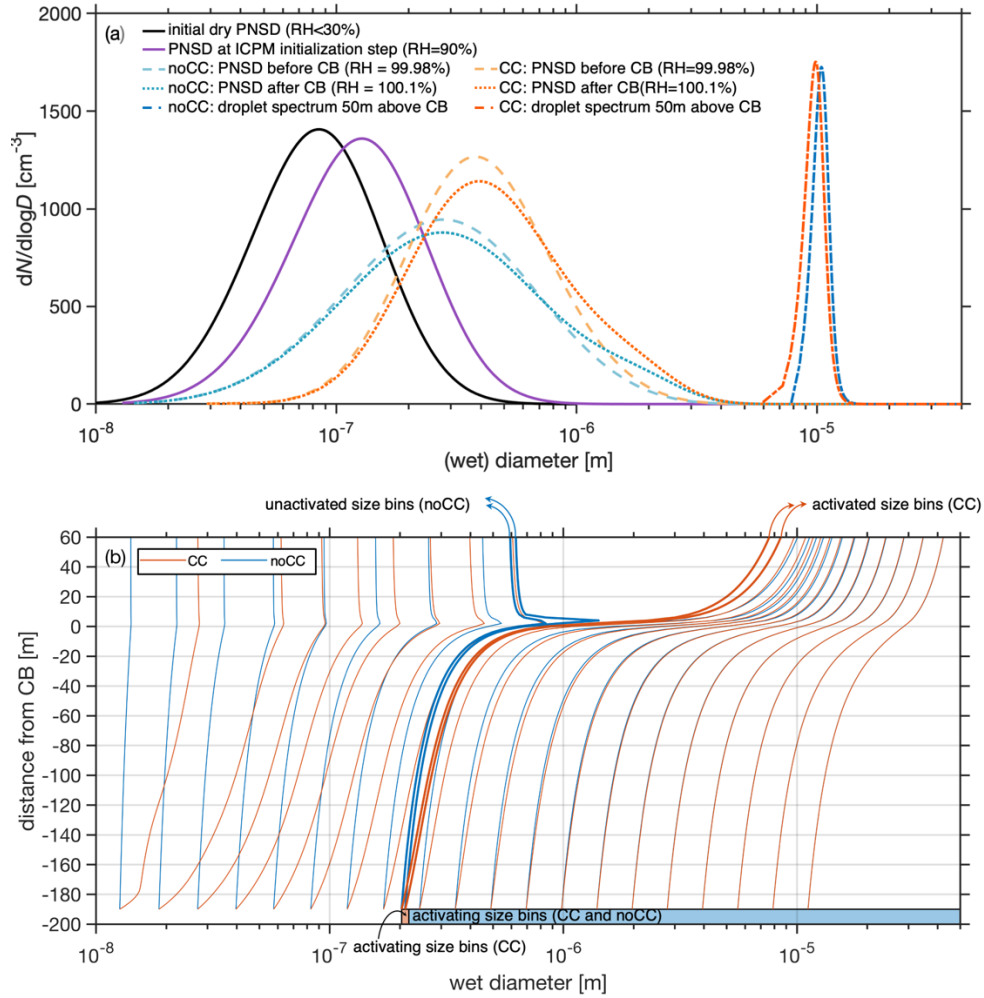

**Figure S.5 (a)** The evolution of the particle number size distribution (PNSD) during the May 11<sup>th</sup> case is shown in Fig. 3. The size distributions are obtained from the simulations using a 0.1 m s<sup>-1</sup> updraft velocity. Red/orange lines correspond to simulations with co-condensation (CC; F volatility distribution) and blue lines simulations without co-condensation (noCC). **(b)** The evolution of the parcel model bin sizes (wet diameter; x-axis) as a function of altitude with respect to cloud base (CB; y-axis). The data shown correspond to the simulation shown in panel (a). The bin sizes grow below the cloud base more in the co-condensation simulations which makes the red/orange and blue lines drift as a function of altitude. The bolded curves show the evolution of size bins corresponding to the range from the smallest activated dry radii with CC ( $r_{CC}^* = 66.0$  nm) to that modeled when CC is turned off ( $r_{noCC}^* = 71.9$  nm). In this range size bins activate only when CC is turned on (small red/orange shaded area at the very bottom of the figure). This results in activation of 4 more size bins as opposed to simulations where CC is turned off. Within the blue shaded area, all size bins activate. The figure composes every 20<sup>th</sup> size bin out of the 400 bins included in the simulations. Within the red shaded size range, every 2<sup>nd</sup> bin is displayed with bolded lines.

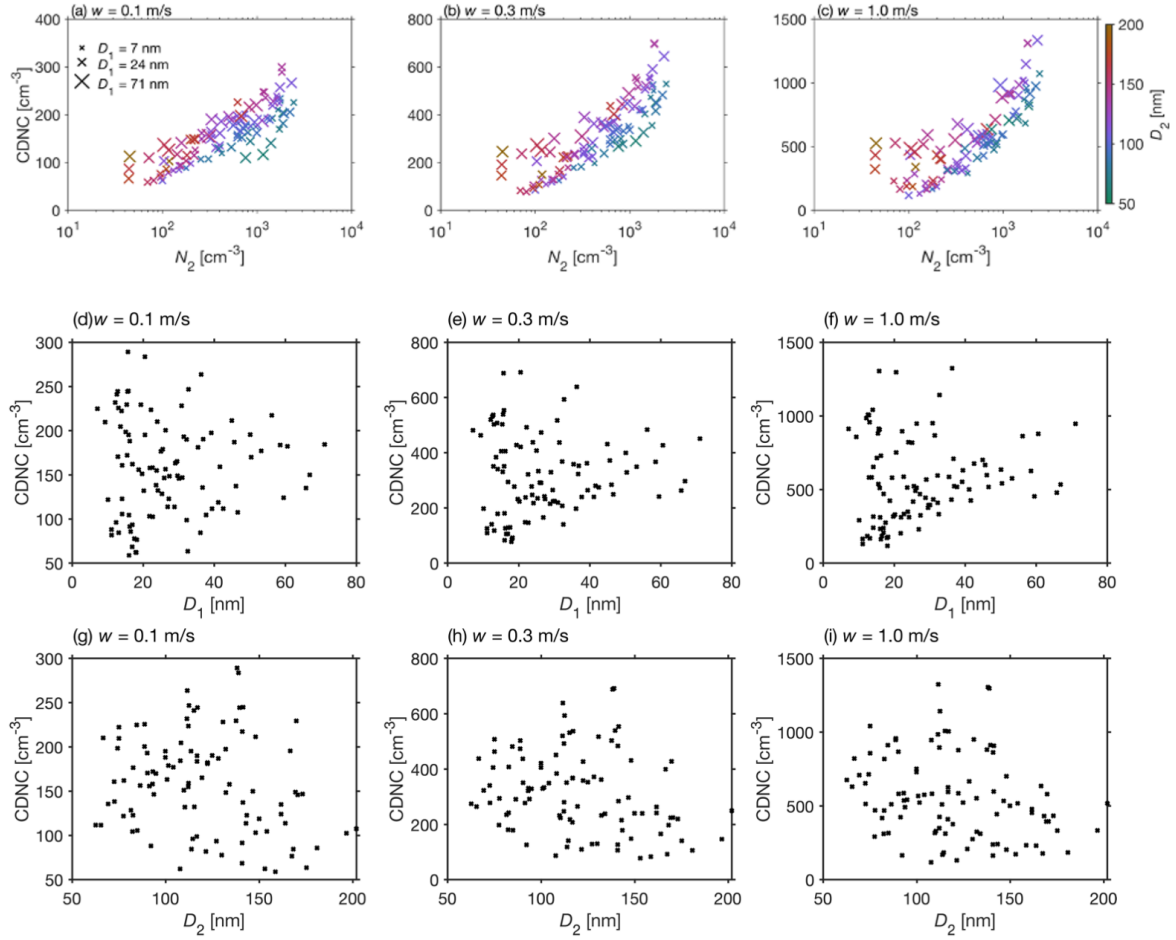

**Figure S.6** The relationship between cloud droplet number concentration (CDNC; y-axis) and accumulation mode number concentration ( $N_2$ ; x-axis), accumulation mode geometric mean diameter ( $D_2$ ; color-coding), and Aitken mode geometric mean diameter ( $D_1$ ; marker size) for the 0.1, 0.3 and 1.0  $\text{m s}^{-1}$  updraft scenarios, respectively (panels a–c) during BAEC. CDNC is obtained from simulations without co-condensation (noCC).  $N_2$ ,  $D_2$ , and  $D_1$  are used as model input data and represent the bimodal fits performed on the measured PNSD using the fitting algorithm by Hussein et al. (2005). Panels d–f and g–i show CDNC vs  $D_1$  and  $D_2$ , respectively, for the different updraft velocities respectively.

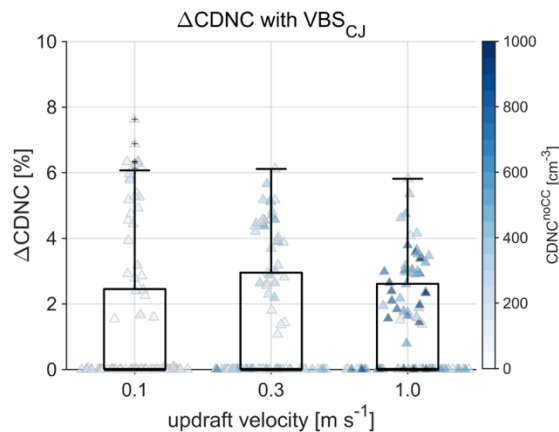

**Figure S.7** Box plots showing the predicted  $\Delta\text{CDNC}$  (using CJ volatility distributions) due to co-condensation in the three different modelling scenarios (0.1, 0.3 and 1.0  $\text{m s}^{-1}$  updrafts). The colored markers represent CDNC (without accounting for co-condensation) in form of a swarmplot.



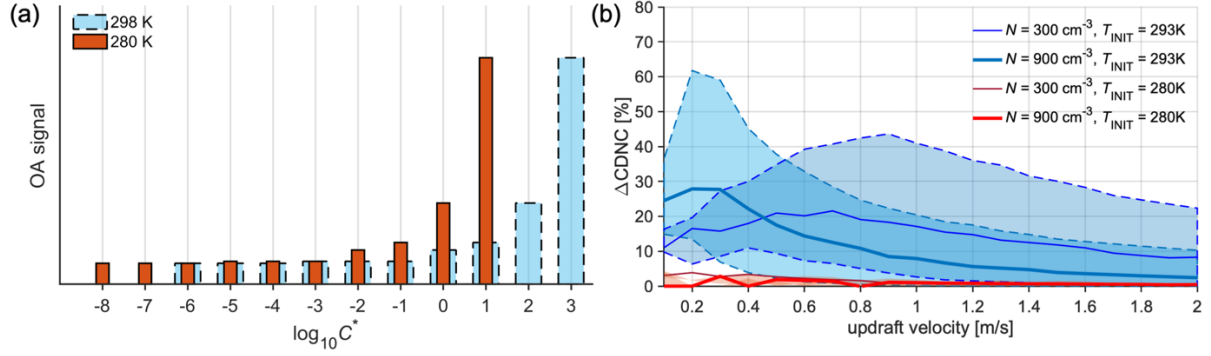

**Figure S.8** (a) The volatility basis set shown in Topping et al. (2013) under their reported initialization temperature (light blue) and under the mean BAEC initialization temperature (in red). The  $\log_{10}C^*$  axis is shifted according using Eq. (13) found in the main text of the paper. (b) Impact of initialization temperature on Figure 3 in Topping et al. (2013) using an initialization RH of 80%. High CDNC enhancements due to co-condensation using the blue volatility distribution is modeled for clean and polluted cases, and agreement with Topping et al. (2013) is found. When utilizing the temperature-adjusted volatility distribution, and initialization temperature of 280 K, and initialization RH of 80% no significant CDNC enhancements are modeled.

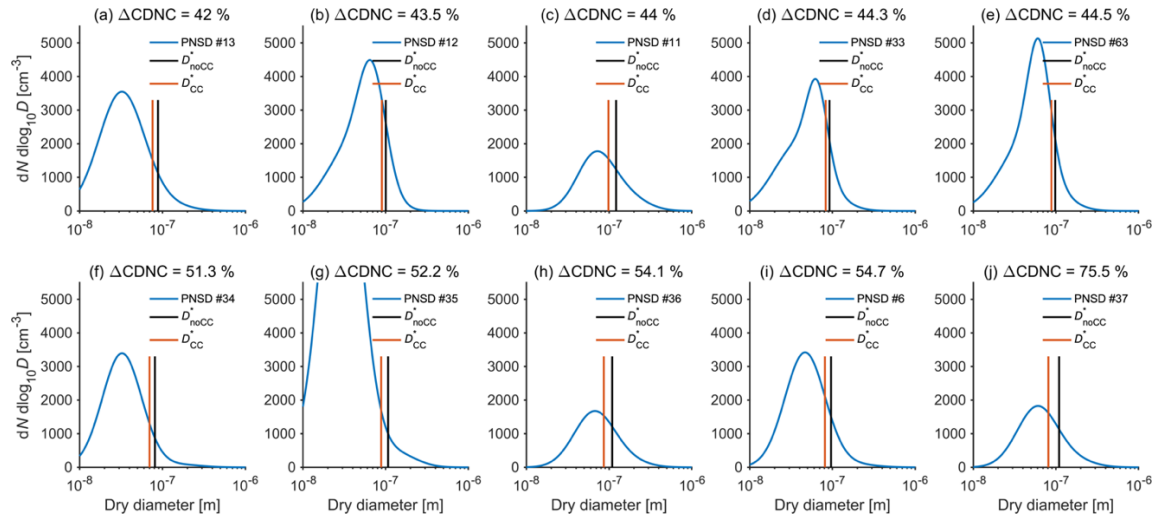

**Figure S.9.** The different panels show the initial dry PNSD (in blue) for the 10 simulations yielding the highest CDNC enhancements due to co-condensation. The smallest activated dry diameters for simulations without co-condensation ( $D_{noCC}^*$ ) are highlighted with the black vertical lines, and the smallest activated dry diameters with co-condensation enabled ( $D_{CC}^*$ ) are shown with the red/orange vertical lines.

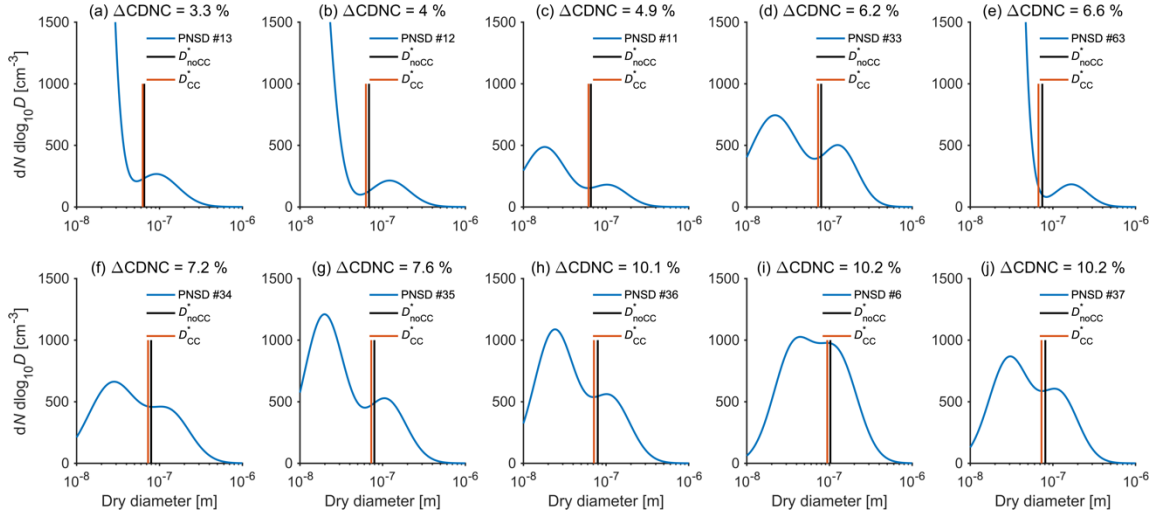

**Figure S.10** The different panels show the initial dry PNSD (in blue) for the 10 simulations yielding the lowest CDNC enhancements due to co-condensation. The smallest activated dry diameters for simulations without co-condensation ( $D_{\text{noCC}}^*$ ) are highlighted with the black vertical lines, and the smallest activated dry diameters with co-condensation enabled ( $D_{\text{CC}}^*$ ) are shown with the red/orange vertical lines.

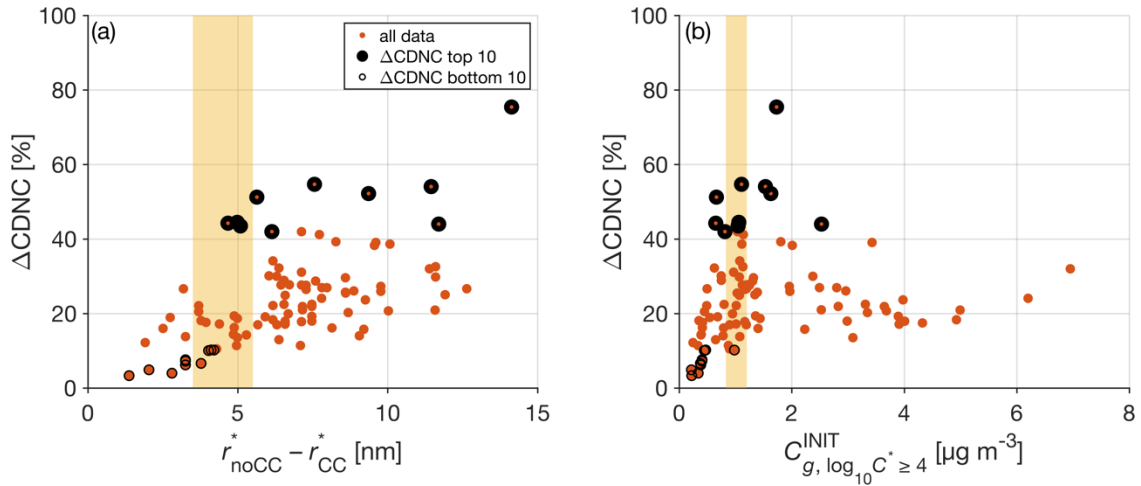

**Figure S.11. (a)** The relationship between the modeled  $\Delta\text{CDNC}$  and the reduction in the smallest activated dry diameters. All the simulations are shown with the red/orange markers, and the top 10  $\Delta\text{CDNC}$  are highlighted with the thick black marker edges, and the bottom 10  $\Delta\text{CDNC}$  with the thin black edges. **(b)** The relationship between  $\Delta\text{CDNC}$  and the initial organic vapor concentration within the  $\log_{10}C^*$  range from -4 to 4 ( $C_{g,-4:4}^{\text{INIT}}$ ). The  $\sim$ similar ranges in the reduction of smallest activated dry radii, and  $C_{g,-4:4}^{\text{INIT}}$  for the bottom 10  $\Delta\text{CDNC}$  and the top 10  $\Delta\text{CDNC}$  are highlighted in yellow demonstrating the significantly different  $\Delta\text{CDNC}$  resulting from the varying PNSD shapes between the two groups.

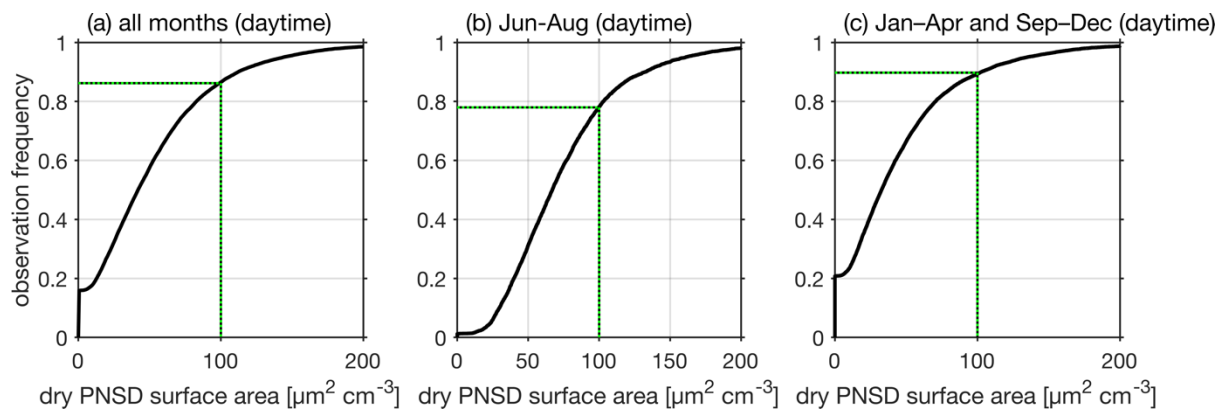

**Figure S.12** Cumulative density functions of the dry PNSD surface area calculated from the 2012–2017 SMEAR II DMPS data. Panel **a** contains all the data, panel **b** the summer months and panel **c** the months outside summer. The green lines depict the  $100 \mu\text{m}^2 \text{cm}^{-3}$  threshold and the frequencies to which the calculated surface areas remain below the threshold (86% of the time in panel **a**, 78% of the time in panel **b** and 90% of the time for panel **c**).

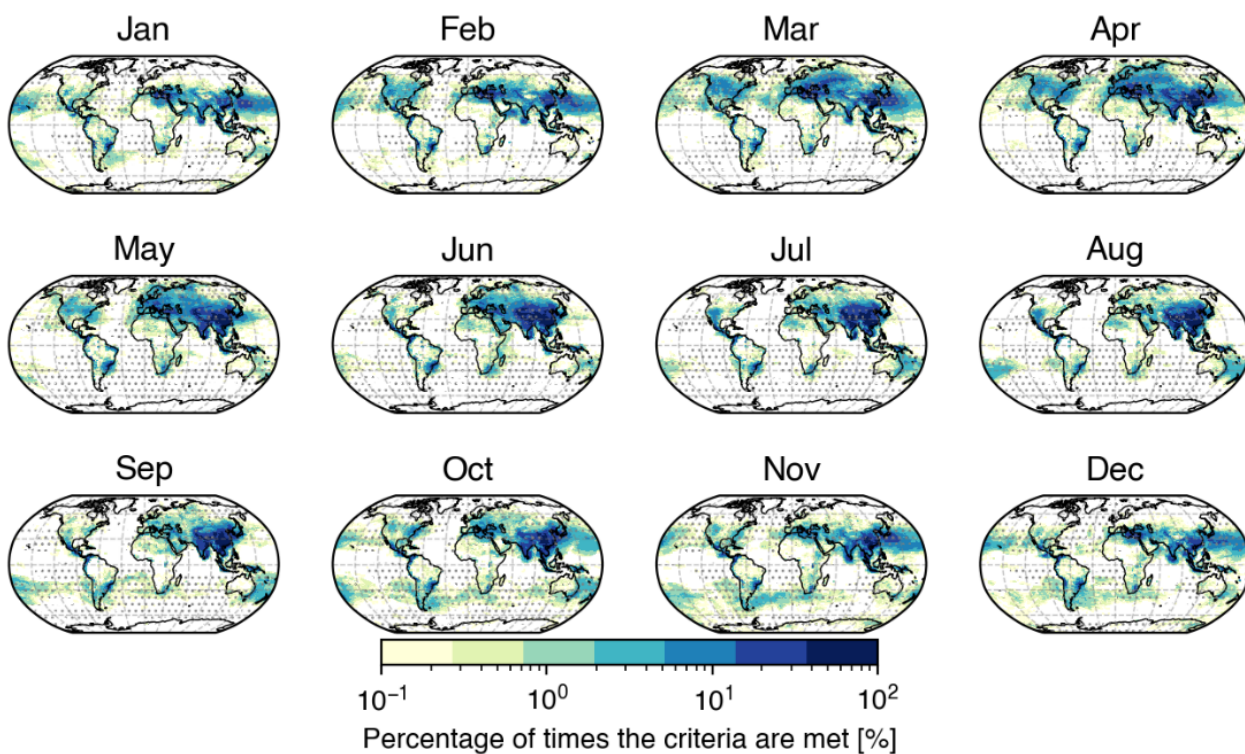

**Figure S.13** A global picture of the percentage of times the criteria are met in a 2009–2013 UKESM1 simulation.  $D_2$ ,  $D_1$  and  $N_1$  are the modal parameters representing the accumulation mode and Aitken mode parameters. The gray markers refer to boreal grid cells, where the median updraft velocity at cloud base is between  $0.2$  and  $0.5 \text{ m s}^{-1}$ . Note the logarithmic axis of the color scale.

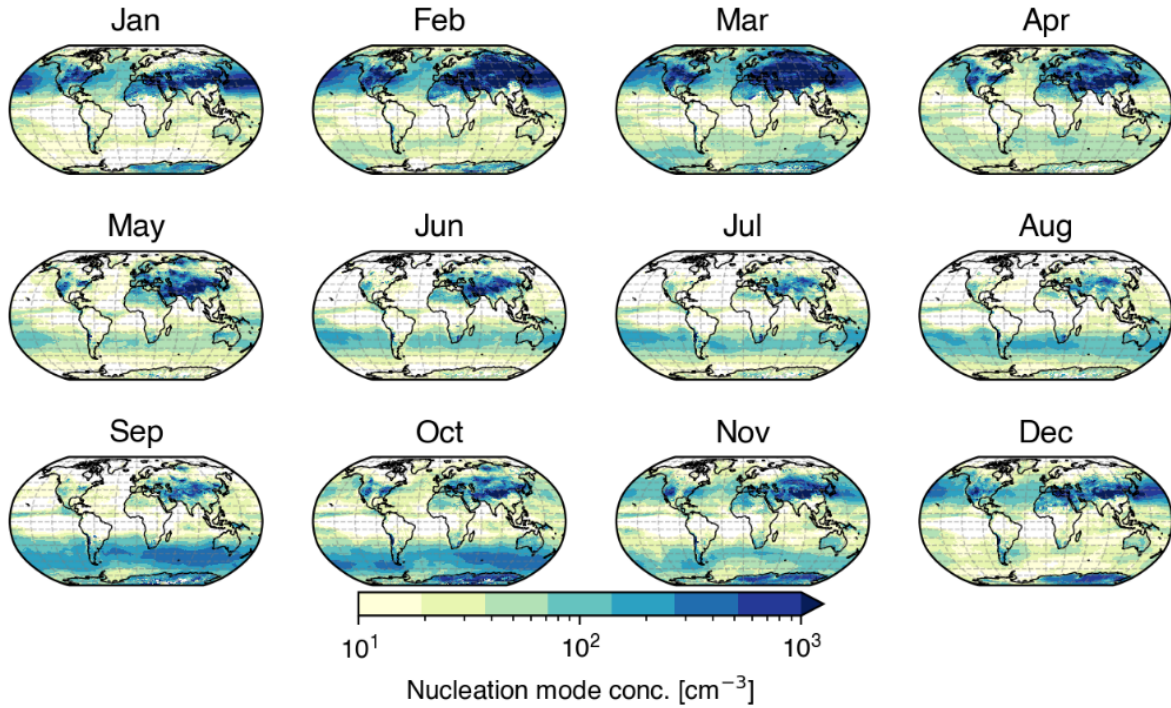

**Figure S.14** A global picture of the average daytime concentrations of the nucleation mode in the 2009–2013 UKESM1 simulation. Note the logarithmic axis of the color scale.

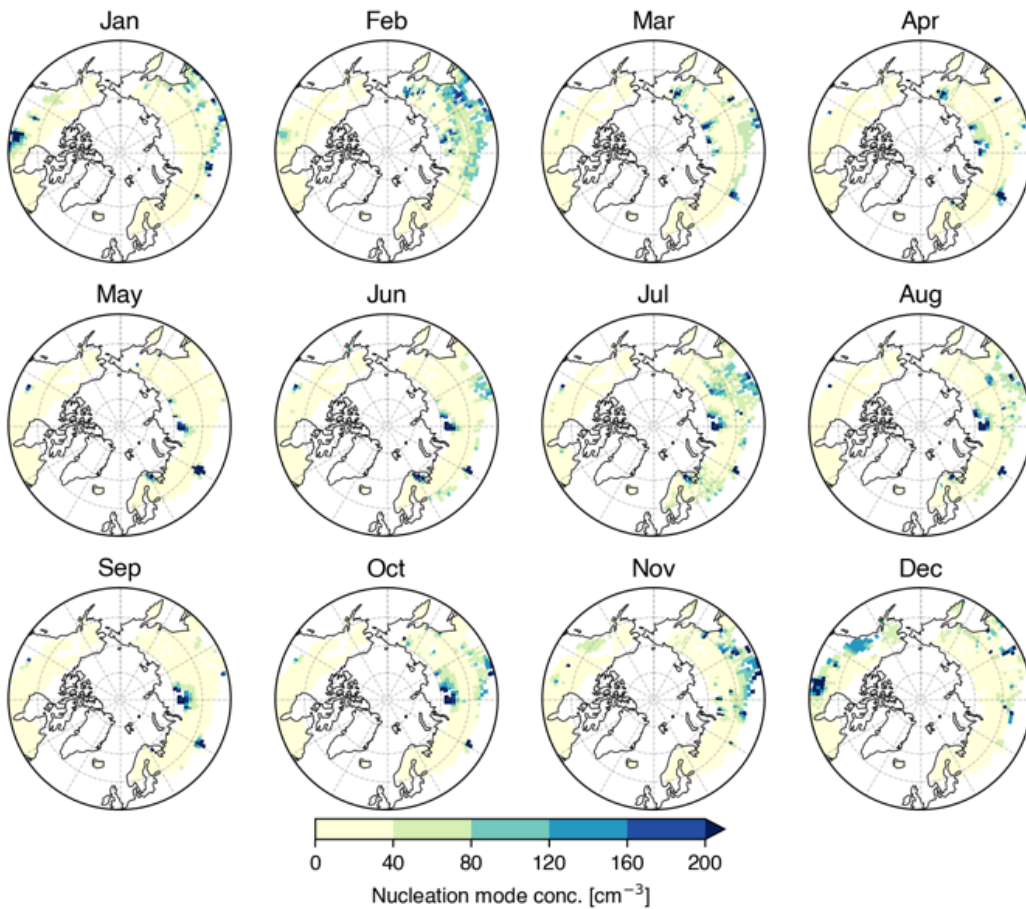

**Figure S.15** The average daytime concentrations of the nucleation mode in the 2009–2013 UKESM1 simulation. Only boreal grid cells are shown.

## References

Äijälä, M., Heikkinen, L., Fröhlich, R., Canonaco, F., Prévôt, A. S. H., Junninen, H., Petäjä, T., Kulmala, M., Worsnop, D., and Ehn, M.: Resolving anthropogenic aerosol pollution types – deconvolution and exploratory classification of pollution events, *Atmospheric Chemistry and Physics*, 17, 3165–3197, <https://doi.org/10.5194/acp-17-3165-2017>, 2017.

Hussein, T., Maso, M. D., Petäjä, T., Koponen, I. K., Paatero, P., Aalto, P. P., Hämeri, K., and Kulmala, M.: Evaluation of an automatic algorithm for fitting the particle number size distributions, *Boreal Environ. Res.*, 10, 19, 2005.

Topping, D., Connolly, P., and McFiggans, G.: Cloud droplet number enhanced by co-condensation of organic vapours, *Nature Geosci*, 6, 443–446, <https://doi.org/10.1038/ngeo1809>, 2013.
